# Supplementary material for: Synergistic Action between Copper Oxide (CuO) Nanoparticles and Anthraquinone-2-Carboxylic Acid (AQ) against Staphylococcus aureus
Source: MDPI journal article supplement (doi:10.3390/jcs7040135), 2023-04-03
Supplement: s1 [file s1]

Archive with 1 entries (1 files):
- jcs-2236790-supplementary.pdf
